# Supplementary material for: Direct two-step spin-crossover through [HS–HS]⋯[LS–LS] at the plateau in dinuclear diiron(ii) complex [{Fe(NCBH3)(4phpy)}2(μ-bpypz)2]
Source: Royal Society of Chemistry journal article supplement (doi:10.1039/b411190g), 2004-01-01
Supplement: b411190g.pdf [file b411190g.pdf]

## Supplementary Information

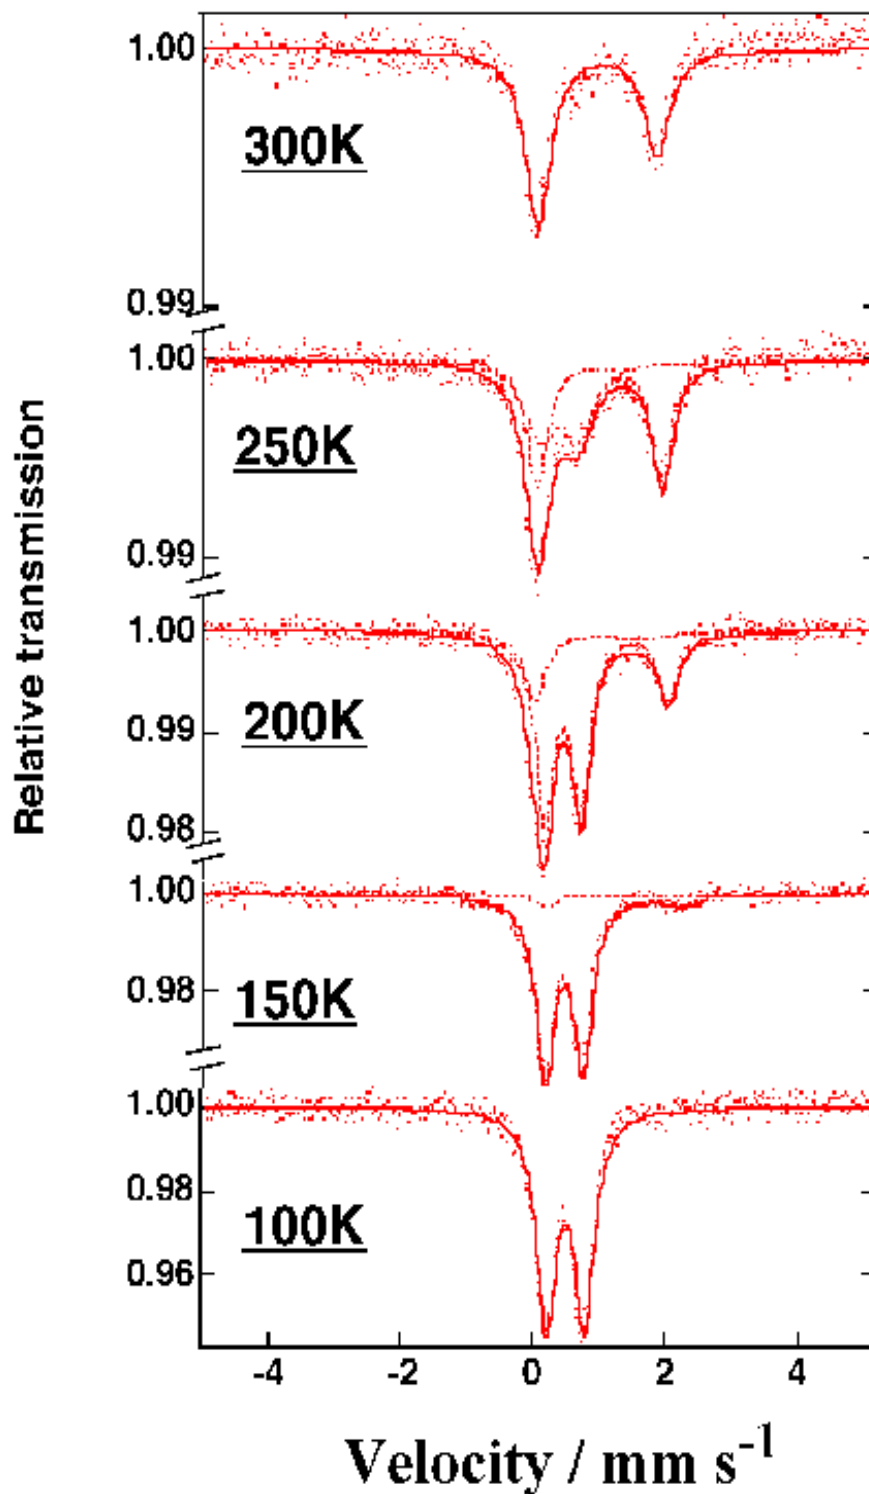

Figure S1 Mössbauer spectra of complex 1

Fig. S1: Mössbauer spectra of complex 1 at 296, 250, 200, 150 and 100 K from the top to the bottom.

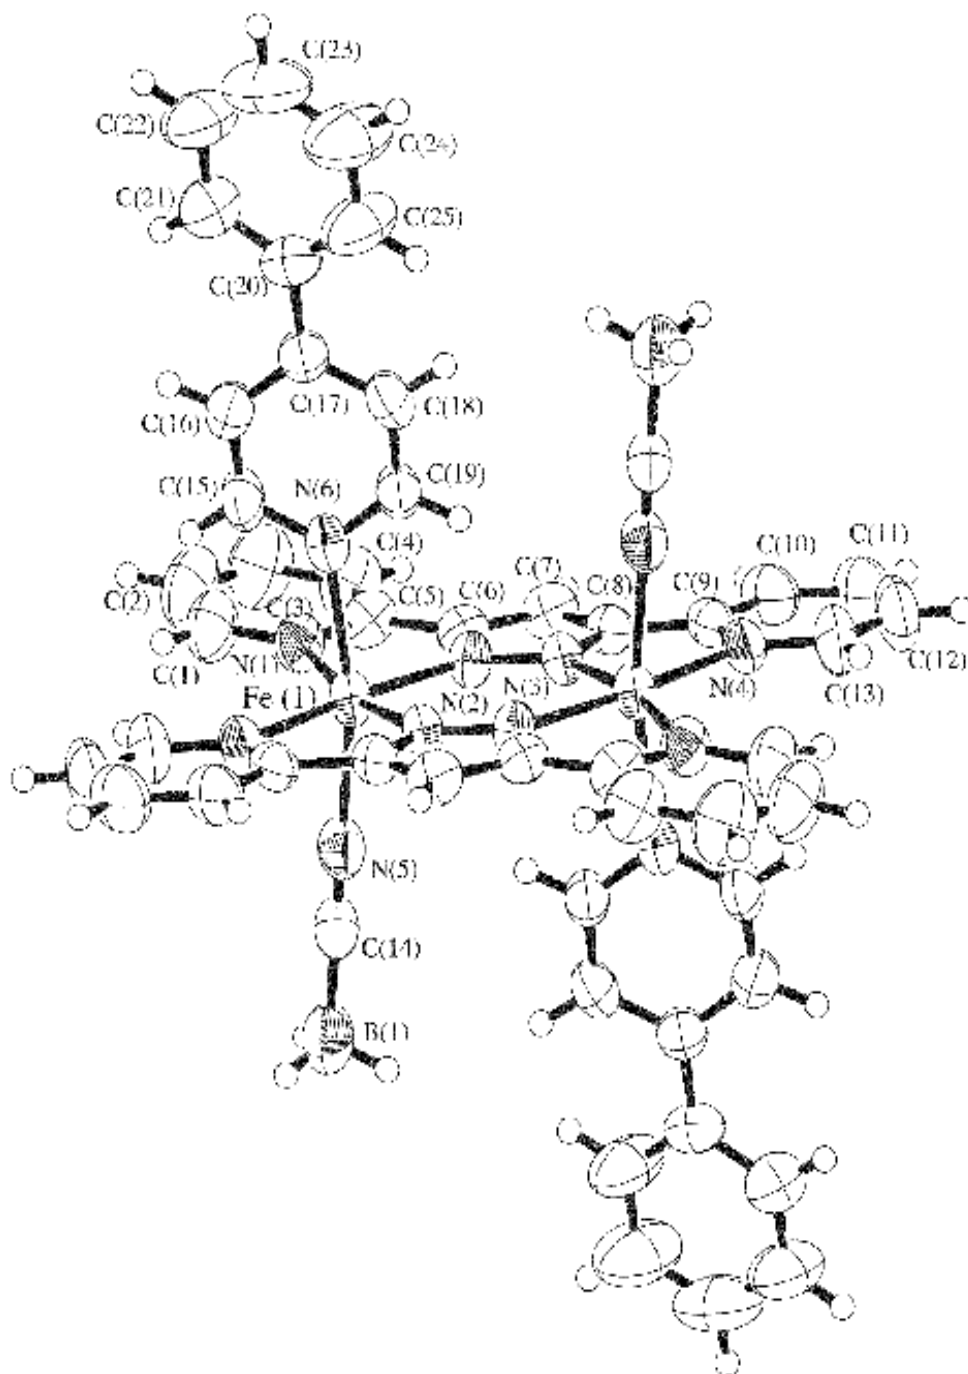

Figure S2 ORTEP drawing with atom numberings of 1 at 300 K.

**Fig. S2:** ORTEP drawing of complex 1 at 296 K.

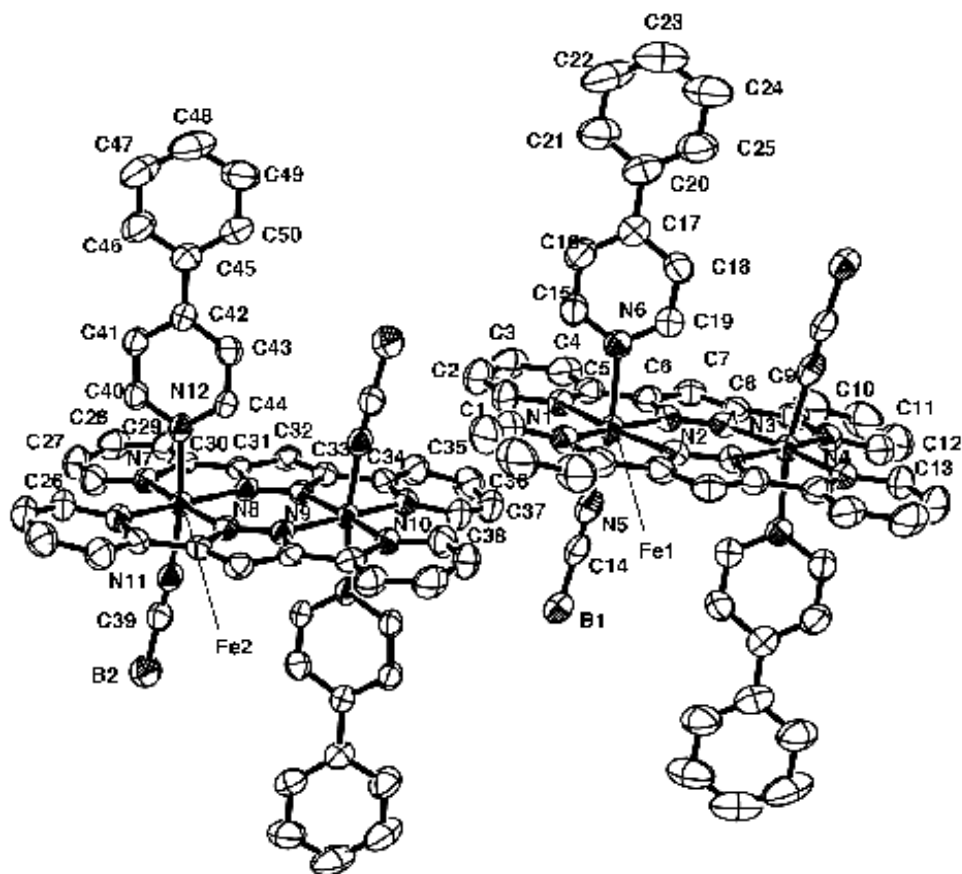

Figure S3 ORTEP drawing with atom labelings of 1; at 200 K.

**Fig. S3:** ORTEP drawing of complex 1 at 200 K.

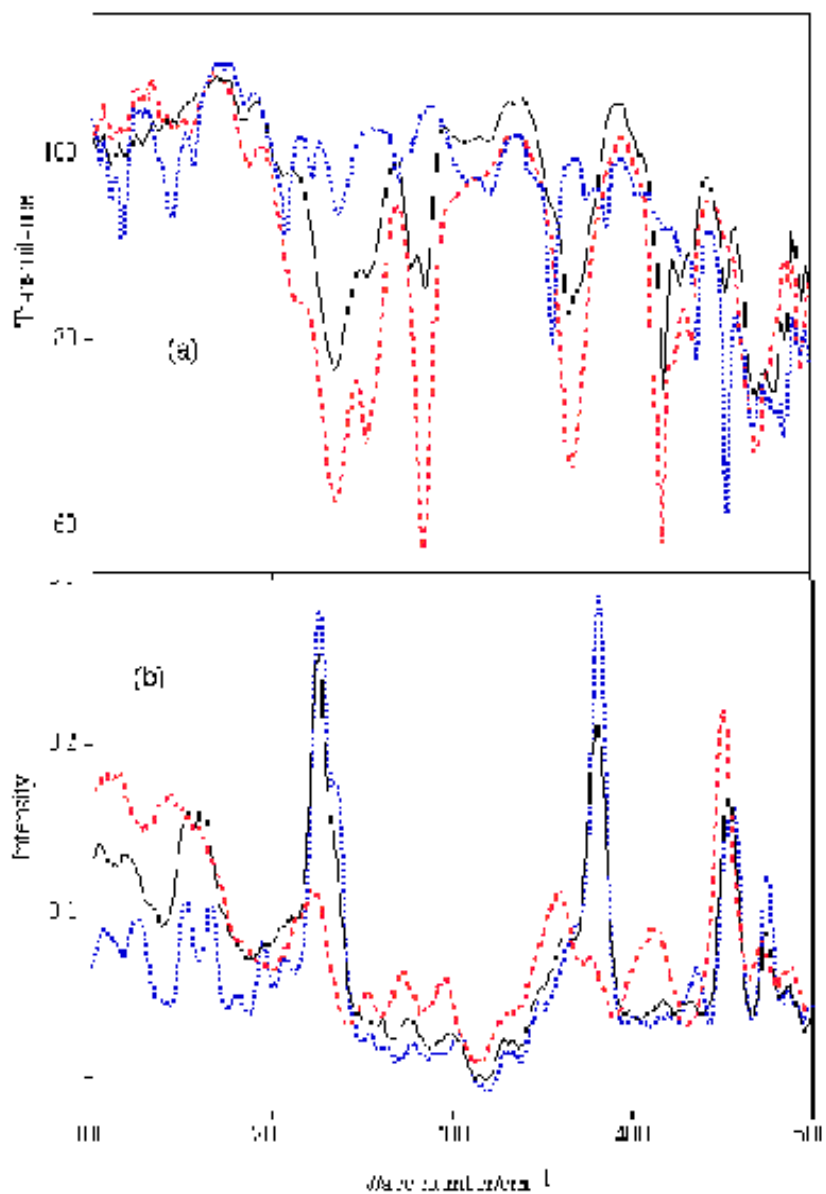

Figure S4 (a) IR (a) and Raman spectra (b) of **1** at 296 K (—), 200 K (---) and 100 K (···).

**Fig. S4:** Far IR (a) and Raman spectra (b) of complex **1** at 296 K (—), 200 K (---) and 100 K (···).
